# Supplementary material for: Chemical Components of Dufour’s and Venom Glands in Camponotus japonicus (Hymenoptera, Formicidae)
Source: MDPI journal article supplement (doi:10.3390/insects14070664), 2023-07-24
Supplement: s1 [file s1]

Table S1 Summary on the chemical components of Dufour's gland in *Camponotus* ant species

| Species and castes                        | Origin    | Main compound (%)                     | Others                                                                                                                                                                                                                                                                                                                                                                                                                                                                                   | Reference                     |
|-------------------------------------------|-----------|---------------------------------------|------------------------------------------------------------------------------------------------------------------------------------------------------------------------------------------------------------------------------------------------------------------------------------------------------------------------------------------------------------------------------------------------------------------------------------------------------------------------------------------|-------------------------------|
| <i>C. pennsylvanicus</i> , workers        | USA       | n-Undecane (C <sub>11</sub> )         |                                                                                                                                                                                                                                                                                                                                                                                                                                                                                          | Ayre and Blum (1971)          |
| <i>C. americanus</i> , workers            | USA       | n-Undecane (C <sub>11</sub> ), >90%   | four alkanes and two alkenes                                                                                                                                                                                                                                                                                                                                                                                                                                                             |                               |
| <i>C. japonicus</i> , workers             | Japan     | n-Undecane (C <sub>11</sub> ), 97%    | small amount of n-decane, 3-methyl-decane and n-tridecane; trace n-dodecane                                                                                                                                                                                                                                                                                                                                                                                                              | Hayashi and Komae (1980)      |
| <i>C. obscuripes</i> , worker             | Japan     | n-Undecane (C <sub>11</sub> ), 96%    |                                                                                                                                                                                                                                                                                                                                                                                                                                                                                          |                               |
| <i>C. herculeanus</i> , workers           | Sweden    | n-Tridecane (C <sub>13</sub> )        | contains a mixture of 29 similar substances, with five others unidentified, but with only two alkanols and one alkanone and no farnesyl acetate                                                                                                                                                                                                                                                                                                                                          |                               |
| <i>C. ligniperda</i> , workers            | Sweden    | n-Tridecane (C <sub>13</sub> )        | contains 37 identified and six unidentified substances, consisting of nalkanes, alkenes, methyl-branched alkanes, n-alcohols, 2-alkanones, alkyl and alkenyl acetates, farnesene and farnesyl acetate                                                                                                                                                                                                                                                                                    | Bergström and Löfgvist (1972) |
| <i>C. intrepidus</i> , workers            | Australia | n-Tridecane (C <sub>13</sub> ), 30%   | n-undecane (25%), n-decane(0.16%), 5-methylundecane (0.05%), 3-methyl-undecane (5%), n-dodecane (2%), 5-methyl-dodecane (0.05%), 3-methyl-dodecane (0.05%), n-tridecene (0.05%), 5-methyl-tridecane (1.4%), 3-methyl-tridecane (4%), n-tetradecane (1.3%), n-pentadecene (0.05%), n-pentadecane (21%), 5-methyl-pentadecane (0.7%), 3-methyl-pentadecane (0.7%), n-hexadecane (0.2%), 5-methyl-hexadecane (0.05%), 3-methyl-hexadecane (6.5%), n-heptadecane (2.5%), dodec-1-ene (0.05%) | Brophy <i>et al.</i> (1973)   |
| <i>C. thoracicus fellah</i> , workers     | Israel    | n-Undecane (C <sub>11</sub> ), 92%    | n-decane (2.5%), n-dodecane (1%), tridecane (1.5%), n-tridecane (4.5%), n-pentadecane (0.5%), n-heptadecane (1%)                                                                                                                                                                                                                                                                                                                                                                         |                               |
| <i>C. thoracicus sanctoides</i> , workers | Israel    | n-Undecane (C <sub>11</sub> ), 75%    | Tridecane (11%), pentadecane (4%), Unknown (9.5%); trace n-decane, n-dodecane, n-tetradecane, n-pentadecane, and n-heptadecane                                                                                                                                                                                                                                                                                                                                                           |                               |
| <i>C. sericeus</i> , workers              | Israel    | n-Tridecane (C <sub>13</sub> ), 70%   | n-undecane (3.4%), n-dodecane (1.8%), 7-methyltridecane (9%), 5-methyltridecane (9%), n-tetradecane (0.8%), n-pentadecane (10%), n-hexadecane (1.5%), heptadecene (3.1%), n-heptadecane (2.8%); trace pentadecene.                                                                                                                                                                                                                                                                       | Hefetz and Orion (1982)       |
| <i>C. lateralis rebecca</i> , workers     | Israel    | n-Tridecane (C <sub>13</sub> ), 93%   | n-undecane (2%), n-dodecane (2%), tridecene (2%), n-pentadecane (0.6%)                                                                                                                                                                                                                                                                                                                                                                                                                   |                               |
| <i>C. gestroi</i> , workers               | Israel    | 5-methyl-Tridecane, 30.3%             | n-undecane (11.6%), n-tridecane (21%), n-pentadecane (15.2%), n-hexadecane (8.9%), n-heptadecane (12.6%); trace n-dodecane and n-pentadecene.                                                                                                                                                                                                                                                                                                                                            |                               |
| <i>C. aethiops</i> , workers              | Corsica   | n-Undecane (C <sub>11</sub> ), 72%    | n-tridecane (18.1%), n-decane (1.41%), n-dodecane (0.46%), n-pentadecane (6.86%)                                                                                                                                                                                                                                                                                                                                                                                                         | Ali <i>et al.</i> (1988a)     |
| <i>C. aethiops</i> , queens               |           | n-Undecane (C <sub>11</sub> ), 77.7%  | n-tridecane (19.5%), n-decane (1.97%), n-dodecaen (0.25%), trace n-pentadecane                                                                                                                                                                                                                                                                                                                                                                                                           |                               |
| <i>C. aegyptiacus</i> , minor workers     | Egypt     | n-Undecane (C <sub>11</sub> ), 78.4%  | n-Tridecane (9%), n-decane (3%), dodecyl acetate (0.2%)                                                                                                                                                                                                                                                                                                                                                                                                                                  |                               |
| <i>C. aegyptiacus</i> , major workers     |           | n-Undecane (C <sub>11</sub> ), 52.2%, | mainly hydrocarbons (C <sub>10</sub> to C <sub>19</sub> ) and acetates (C <sub>10</sub> to C <sub>20</sub> ); trace compounds of two                                                                                                                                                                                                                                                                                                                                                     | Ali <i>et al.</i> (1988b)     |

| Species and castes                 | Origin       | Main compound (%)                                                         | Others                                                                                                                                                                                                                                                              | Reference                          |
|------------------------------------|--------------|---------------------------------------------------------------------------|---------------------------------------------------------------------------------------------------------------------------------------------------------------------------------------------------------------------------------------------------------------------|------------------------------------|
| <i>C. vagus</i> , workers          | Corsica      | Dodecyl acetate (28.2%)                                                   | alcohols, two propionates and one terpenoid compound (farnesyl acetate). Different from minors, n-tridecane (3.9%) and n-decane (0.5%), dodecyl acetate (28.2%).                                                                                                    | Bagnères <i>et al.</i> (1991)      |
| <i>C. lateralis</i> , workers      |              | n-Undecane (C <sub>11</sub> ), 70%<br>n-Tridecane (C <sub>13</sub> ), 22% | 99% of contents is alkanes (C <sub>9</sub> to C <sub>15</sub> ) and alkenes (C <sub>11</sub> to C <sub>19</sub> ); small quantities of three methyl-branched alkanes, four acetates and dodecanol.                                                                  |                                    |
| <i>C. atriceps</i> , workers       | France       | n-Tridecane (C <sub>13</sub> ), 73.9%                                     | 23 substances were recognized, chiefly alkanes and alkyl acetates, n-tridecane (73.9%), followed by 5-pentadecene (13.25%) and tetradecyl acetate (17.26%); small quantities of a farnesene isomer and geranylgeranyl acetate.                                      | Haak <i>et al.</i> (1996)          |
| <i>C. floridanus</i> , workers     | USA          | n-Undecane (C <sub>11</sub> ), 76.24%                                     | 33 hydrocarbons (C <sub>10</sub> to C <sub>21</sub> ); trace amount of the doubly unsaturated straight chain tridecadiene, heptadecadiene and nonadecadiene.                                                                                                        | Brand <i>et al.</i> (1999)         |
| <i>C. arminius</i> , workers       |              | n-Undecane (C <sub>11</sub> ), 90%                                        | Hydrocarbons (C <sub>10</sub> to C <sub>19</sub> ); small quantities of monomethyl alkanes and two oxygenated compounds (9-octadecenol and 2,3-dihydro-6t-farnesal)                                                                                                 |                                    |
| <i>C. socius</i> , workers         | South Africa | n-Undecane (C <sub>11</sub> ), 67%<br>n-Tridecane (C <sub>13</sub> ) 19%  | Other hydrocarbons (C <sub>10</sub> to C <sub>17</sub> ), two terpenoid compounds (geranyllinalool and geranylfarnesol), and trace amount of tridecene.                                                                                                             | Kohl <i>et al.</i> (2001)          |
| <i>C. castaneus</i> , workers      | USA          | n-Undecane (C <sub>11</sub> ), 93%                                        | The straight chain saturated hydrocarbons (C <sub>9</sub> to C <sub>19</sub> , and C <sub>21</sub> ) with n-undecane 93%; corresponding mono-unsaturated, straight chain hydrocarbons (C <sub>11</sub> to C <sub>13</sub> and C <sub>16</sub> to C <sub>20</sub> ). | Kohl <i>et al.</i> (2003)          |
| <i>C. balzani</i> , workers        | Peru         | n-Octyl hexanoate, 97%                                                    | mono-unsaturated, straight chain hydrocarbons (C <sub>12</sub> to C <sub>13</sub> , and C <sub>16</sub> to C <sub>19</sub> ), and a small amount of a nonadecadiene.                                                                                                |                                    |
| <i>C. sericeiventris</i> , workers | Argentina    | n-Undecane (C <sub>11</sub> ), 84%                                        | consist mainly of esters, and Octyl hexanoate makes up about 97% of the total volatile.                                                                                                                                                                             | Fujiwara-Tsujii <i>et al.</i> 2006 |
| <i>C. obscuripes</i> , workers     | Japan        | n-Undecane(C <sub>11</sub> ), >90%                                        | mono-unsaturated, straight chain hydrocarbons in the ranges C <sub>11</sub> to C <sub>19</sub> (with exception of C <sub>14</sub> to C <sub>18</sub> ), and also a small amount of 6, 9-heptadecadiene.<br>n-decane and n-pentadecane                               |                                    |
