# Supplementary material for: Chemical Components of Dufour’s and Venom Glands in Camponotus japonicus (Hymenoptera, Formicidae)
Source: MDPI journal article supplement (doi:10.3390/insects14070664), 2023-07-24
Supplement: s1 [file s1]

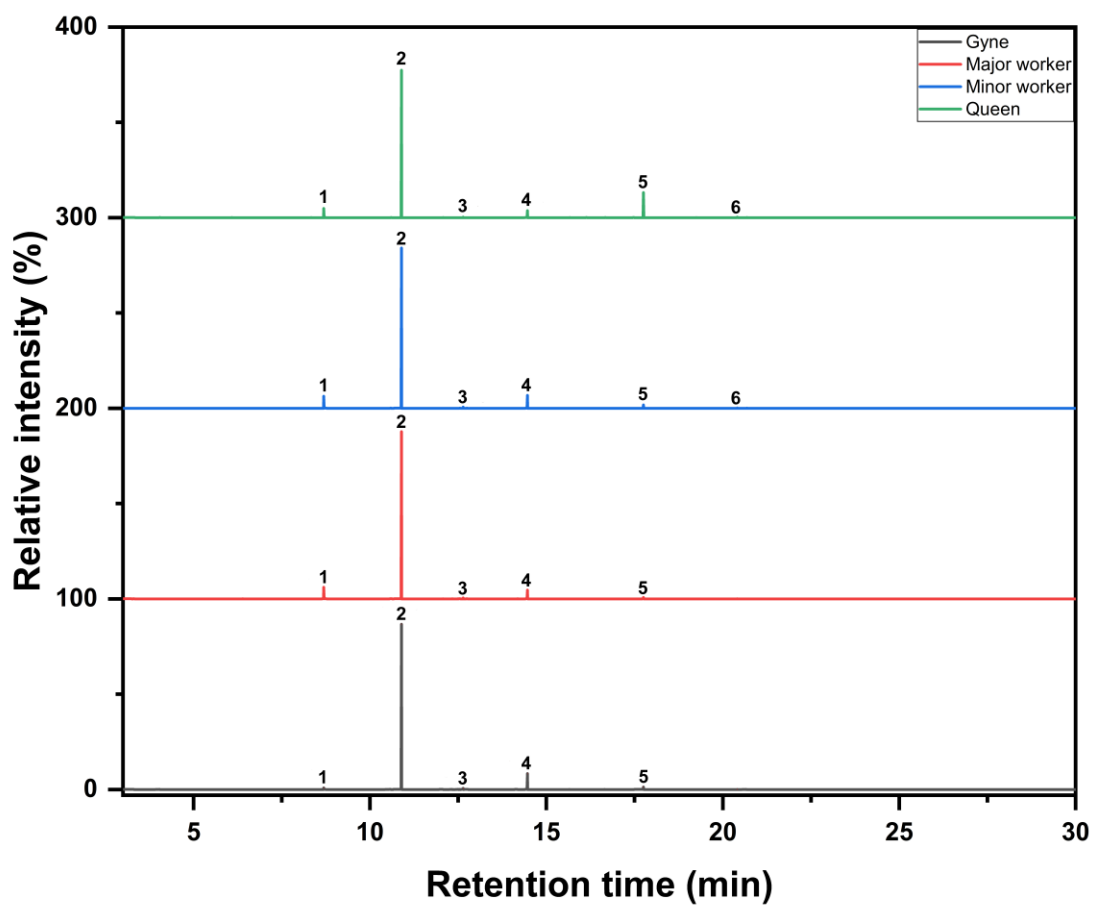

Figure S1: GC-MS total ion current chromatograms of chemical components derived from the Dufour's gland in different castes of *C. japonicus* (SPME method). The peak numbers correspond to compound numbers in Table 1.

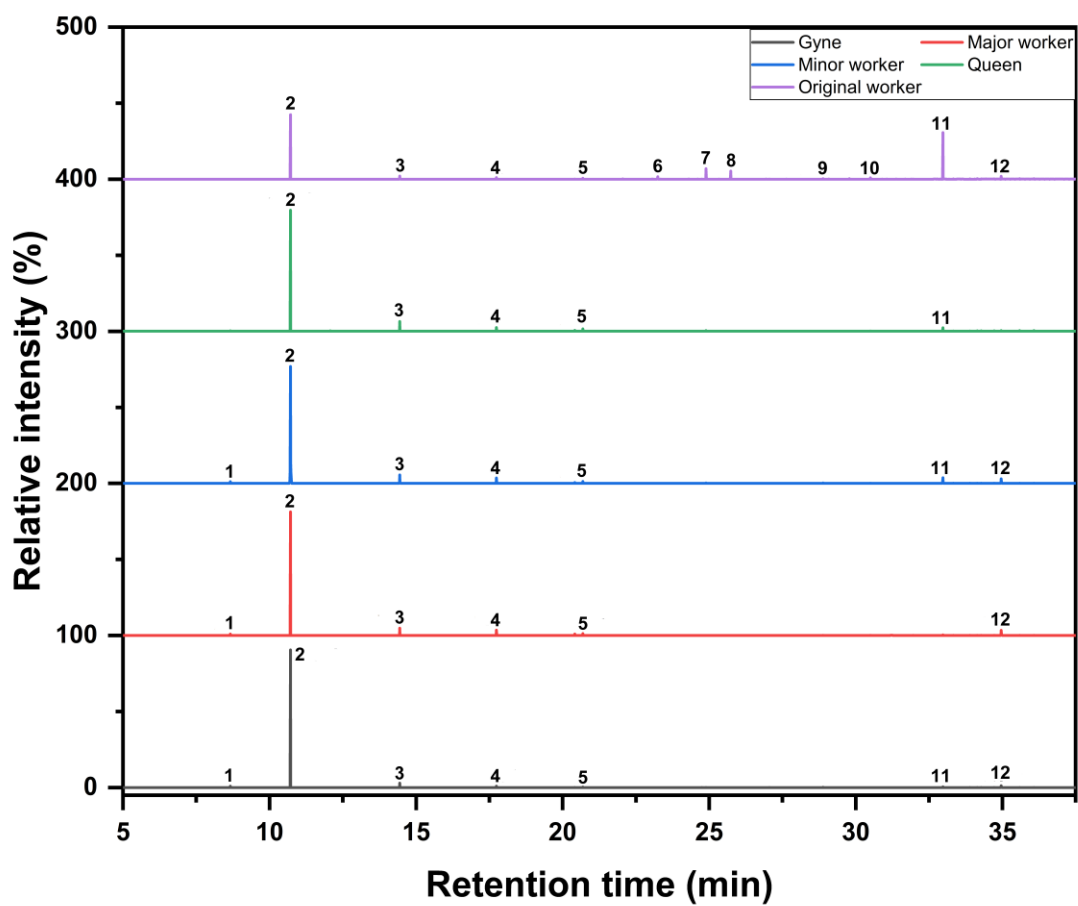

Figure S2: GC-MS total ion current chromatograms of chemical components derived from Dufour's gland in different castes of *C. japonicus* (hexane solution method). The peak numbers correspond to compound numbers in Table 2.

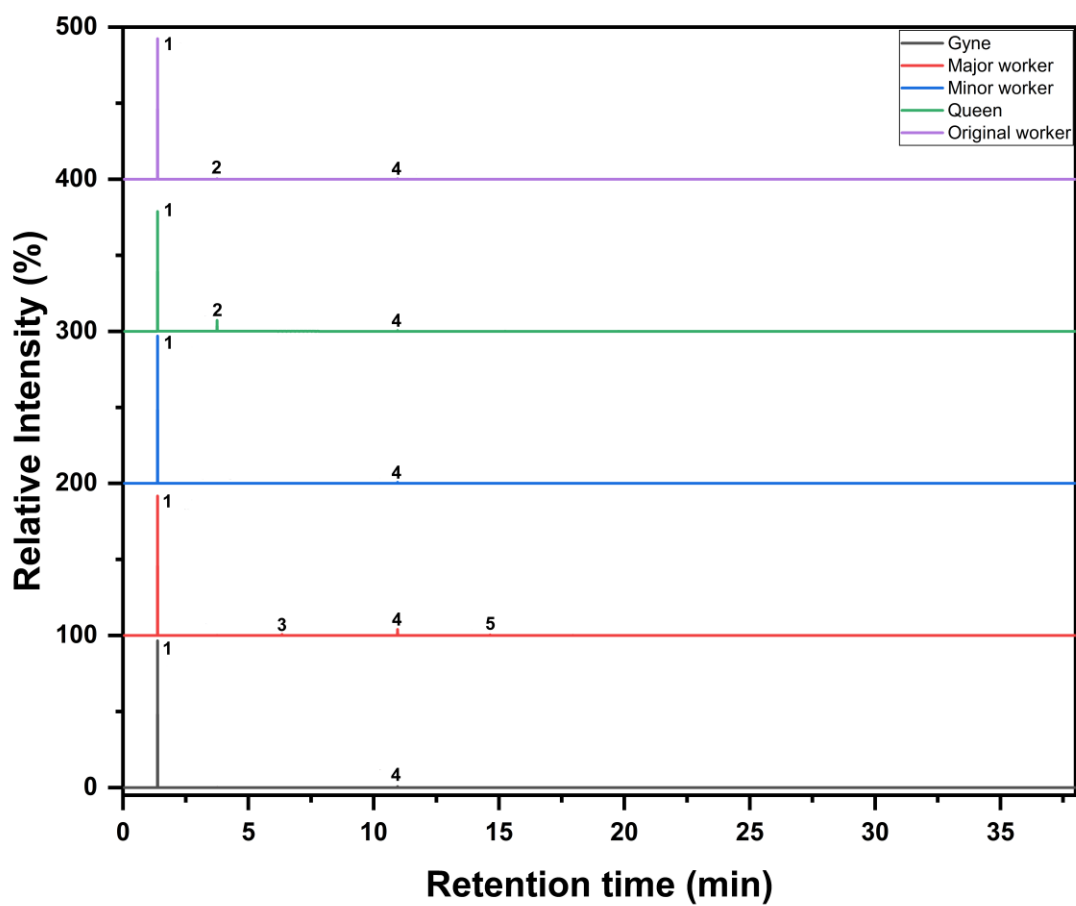

Figure S3: GC-MS total ion current chromatograms of chemical components derived from the venom gland in different castes of *C. japonicus* (SPME method). The peak numbers correspond to compound numbers in Table 3.

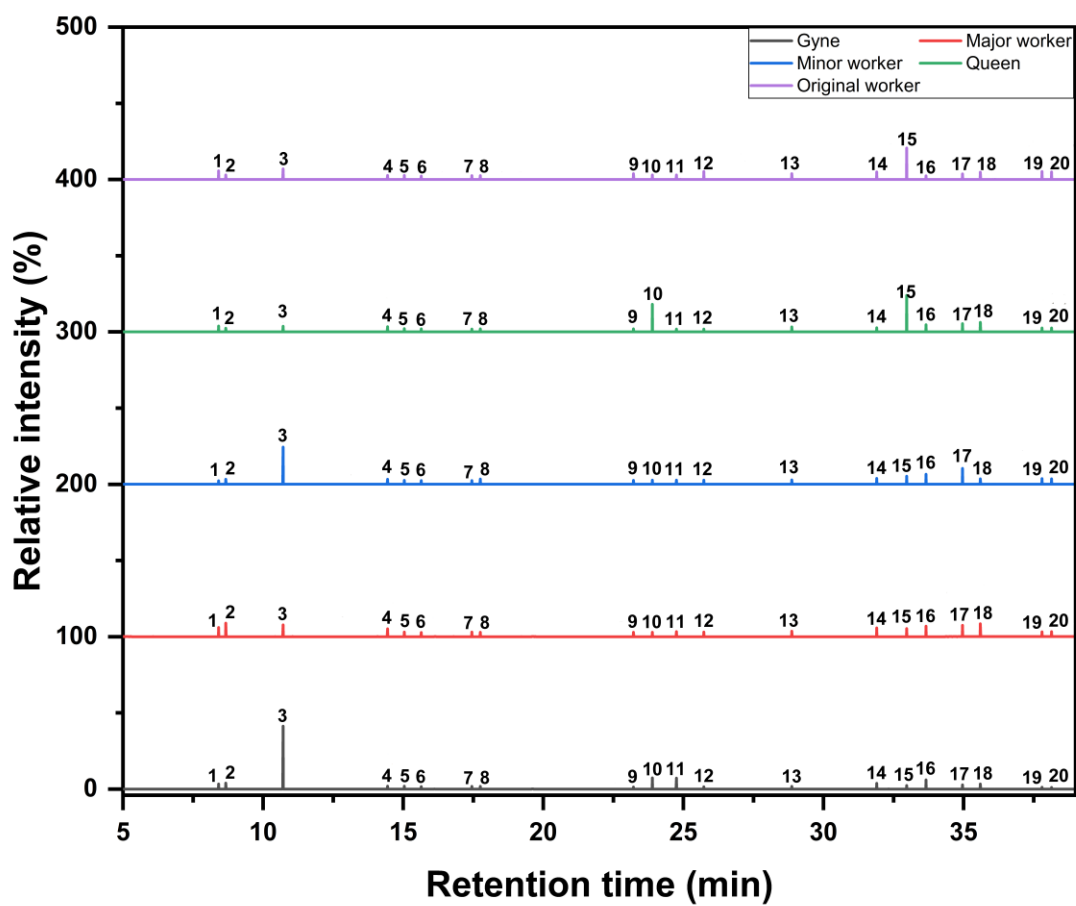

Figure S4: GC-MS total ion current chromatograms of chemical components derived from the venom gland in different castes of *C. japonicus* (hexane solution). The peak numbers correspond to compound numbers in Table 4.
